# Supplementary material
Source: publisher figshare collection journal article supplement (https://acs.figshare.com/ndownloader/files/3713395)
Supplement: Supplementary file 1 [file 3713395]

## An Experimental Investigation of the Adsorption of a Phosphonic Acid on the Anatase TiO<sub>2</sub>(101) Surface

Michael Wagstaffe,<sup>†</sup> Andrew G. Thomas,<sup>\*,‡</sup> Mark J. Jackman,<sup>†</sup> Maria Torres-Molina,<sup>¶</sup> Karen L. Syres,<sup>§</sup> and Karsten Handrup<sup>||</sup>

\*To whom correspondence should be addressed

<sup>†</sup>School of Physics and Astronomy, The University of Manchester, Oxford Road, M13 9PL, UK

<sup>‡</sup>School of Materials and Photon Science Institute, The University of Manchester, Oxford Road, Manchester, M13 9PL, UK □

<sup>¶</sup>School of Chemistry, The University of Manchester, Oxford Road, Manchester, M13 9PL, UK

<sup>§</sup>Jeremiah Horrocks Institute, The University of Central Lancashire, Fylde Road, Preston, PR1 2HE, UK

<sup>||</sup>MaxLab, Ole Romers Vag, Lund, Sweden

**S.1.** Shows the survey scan recorded from the anatase TiO<sub>2</sub>(101) surface, at 1000 eV photon energy, following cleaning by repeated sputter and anneal cycles. No surface contamination is observed other than a small amount of residual argon from the sputtering procedure.

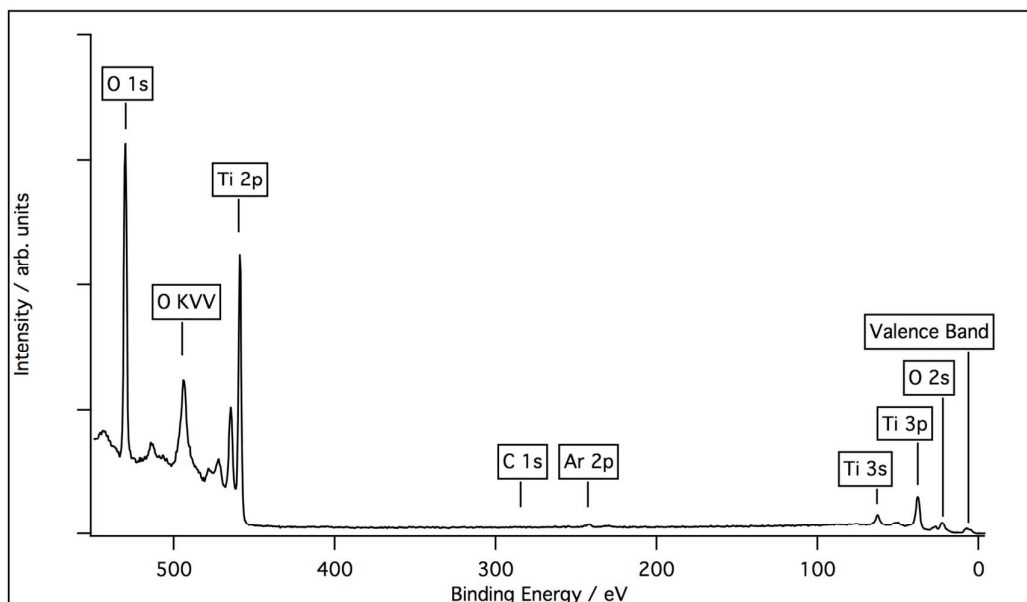

**S.2. Details of the calculation used to determine the surface coverage of PPA on anatase TiO<sub>2</sub>(101) and the quantitative definition of a monolayer**

Catechol is known to saturate at monolayer coverage at room temperature,<sup>[1,2]</sup> therefore by comparing the C 1s:Ti 2p ratio in the catechol spectra to that of the PPA spectra, the coverage of PPA on anatase TiO<sub>2</sub>(101) can be estimated. This method assumes that PPA adsorbs on to the anatase TiO<sub>2</sub>(101) surface in a similar manner to catechol, i.e. through two oxygen atoms to neighboring Ti 5c atoms. The following equation has been used.<sup>[1]</sup>

$$\% \text{ ML} = \frac{I_{\text{C } 1s} / I_{\text{Ti } 2p}}{I_{\text{C } 1s (\text{catechol})} / I_{\text{Ti } 2p (\text{catechol})}} \times 100$$

|                             | <b>Ti 2p total peak area</b> | <b>C1s total peak area</b> | <b>C 1s/Ti 2p</b> | <b>% ML</b> |
|-----------------------------|------------------------------|----------------------------|-------------------|-------------|
| <b>Catechol ML coverage</b> | 4,744.95                     | 3,836.10                   | 0.81              | 100         |
| <b>PPA Dose 1</b>           | 8,189.10                     | 965.60                     | 0.12              | ~15         |
| <b>PPA Dose 2</b>           | 32,365.80                    | 21,651.10                  | 0.67              | ~85         |

Below is a picture of the anatase (101) surface. In order to gain a quantitative approximation for monolayer coverage we defined the surface unit cell as highlighted by a yellow rectangle below. This has an area of 14.9Å<sup>2</sup> and contains a single Ti 5c atom. Since we are assuming that 1 molecule binds to two Ti 5c atoms, this means each “unit cell” contains 0.5 molecules at monolayer coverage. Therefore we can define 1 ML as 0.03 molecules/ Å<sup>2</sup>.

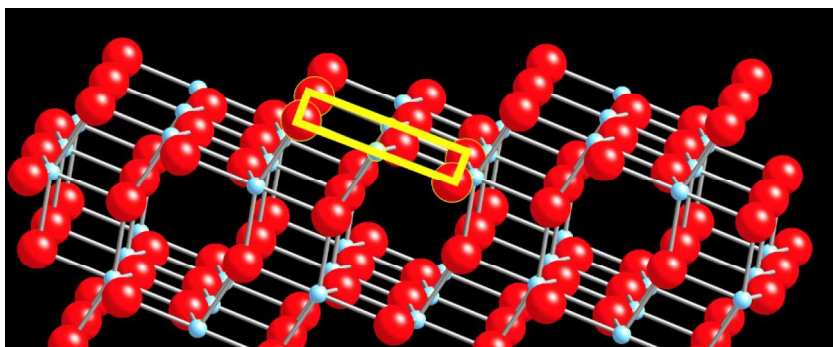

**S.3.** A graph showing the expanded NEXAFS spectra, highlighting the asymmetry of the main  $\pi^*$  peak

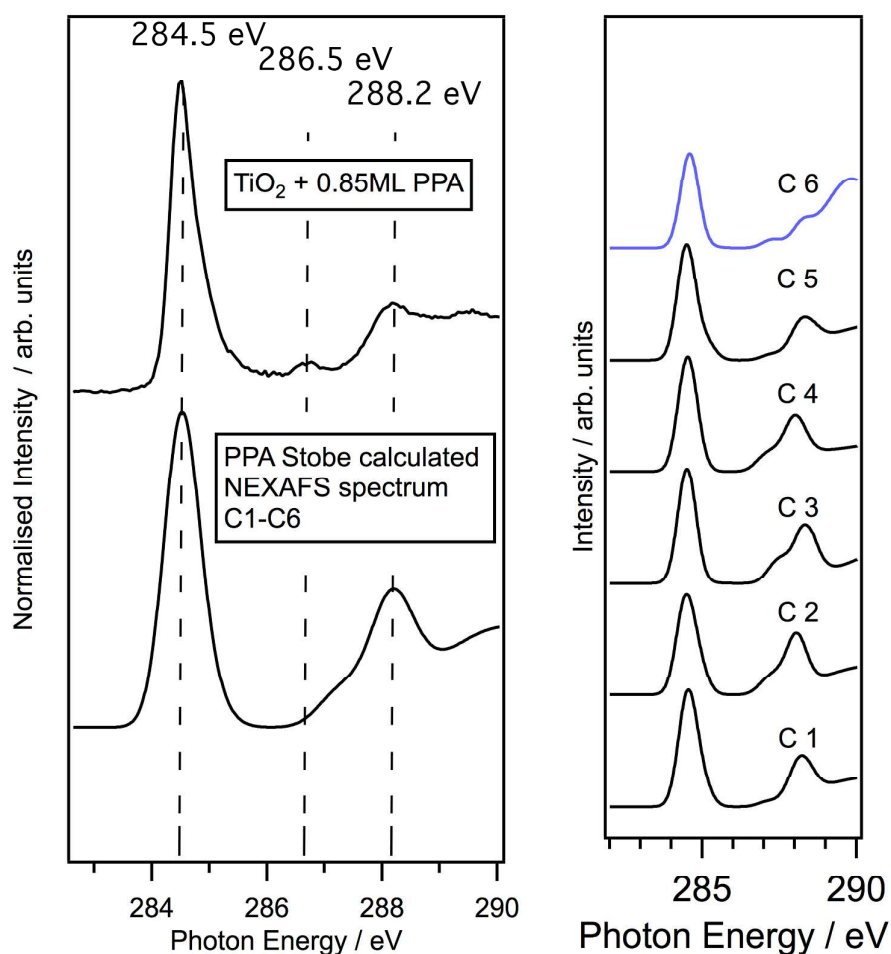

- (1) Syres, K. L.; Thomas, A. G.; Flavell, W. R.; Spencer, B. F.; Bondino, F.; Malvestuto, M.; Preobrajenski, A.; Grätzel, M. Adsorbate-induced modification of surface electronic structure: pyrocatechol adsorption on the anatase  $\text{TiO}_2$  (101) and rutile  $\text{TiO}_2$  (110) surfaces. *J. Phys. Chem. C* **2012**, *116*, 23515–23525. [DOI](#)
- (2) Li, S.-C.; Wang, J.-g.; Jacobson, P.; Gong, X.-Q.; Selloni, A.; Diebold, U. Correlation between bonding geometry and band gap states at organic–inorganic interfaces: catechol on rutile  $\text{TiO}_2$  (110). *J. Am. Chem. Soc.* **2009**, *131*, 980–984. [DOI](#)
